# Supplementary material
Source: publisher figshare collection journal article supplement (https://tandf.figshare.com/ndownloader/files/20449356)
Supplement: Supplementary file 1 [file 20449356]

Appendix A

Examples of Semi-Structured Interview Questions

1. What has helped keep you engaged in your leisure activities?
2. Why have you stopped engaging in some of your leisure activities?
3. Do you have a sense as to why you don’t engage in some of your desired leisure interests anymore? Can you tell me more about that?
4. Are there activities that you would like to engage in now that you are living here, but don’t?
5. Is there anything else you would like me to know about the things that you like to do?
6. Is there anything else you would like to expand on?
